# Supplementary material for: Networks of stress, affect and eating behaviour: anticipated stress coping predicts goal-congruent eating in young adults
Source: PubMed Central journal article supplement (PMC7796605; doi:10.1186/s12966-020-01066-8), 2021-01-09
Supplement: 12966_2020_1066_MOESM1_ESM.pdf [file 12966_2020_1066_MOESM1_ESM.pdf]

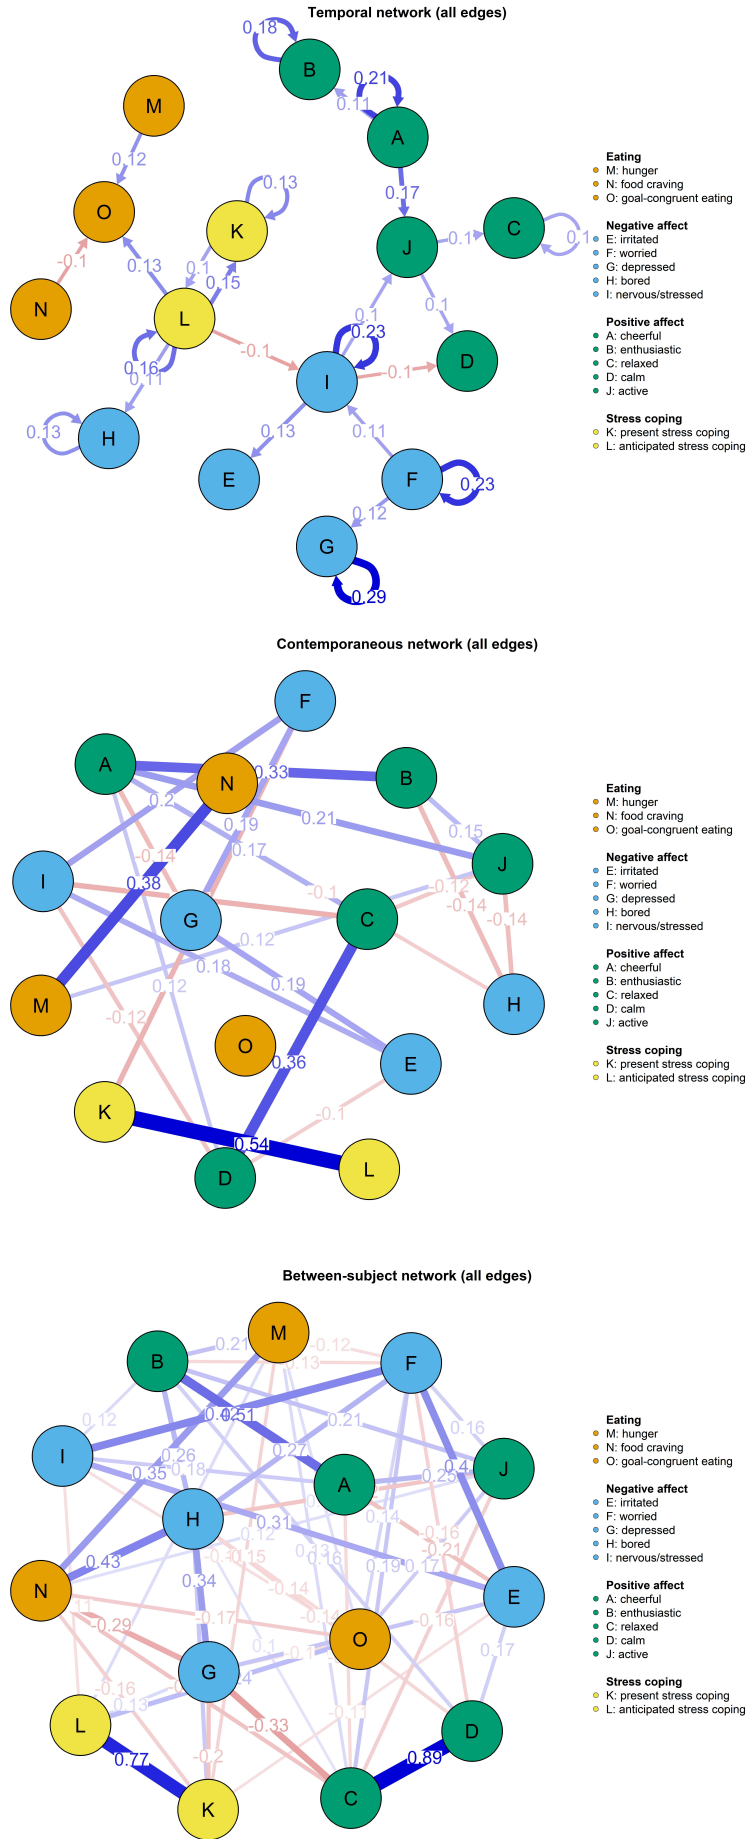

Figure 5. Temporal, contemporaneous and between-subject networks without significance threshold. Note. Please see the legend above for meanings of coloured circles as well as abbreviations. All associations that show effect sizes of  $r > .1$  are displayed in the networks. Blue edges indicate a positive association, whereas red edges indicate a negative one. The coefficients are displayed on or next to the respective edges
