# Supplementary material for: Networks of stress, affect and eating behaviour: anticipated stress coping predicts goal-congruent eating in young adults
Source: PubMed Central journal article supplement (PMC7796605; doi:10.1186/s12966-020-01066-8), 2021-01-09
Supplement: 12966_2020_1066_MOESM2_ESM.pdf [file 12966_2020_1066_MOESM2_ESM.pdf]

## Networks of stress, affect and eating behaviour: anticipated stress coping predicts goal-congruent eating in young adults

Björn Pannicke, Tim Kaiser, Julia Reichenberger and Jens Blechert

International Journal of Behavioral Nutrition and Physical Activity

<https://doi.org/10.1186/s12966-020-01066-8>

### Supplementary material: Table 2

Means, standard deviations, and zero-order correlations with confidence intervals

| Variable                      | <i>M</i> | <i>SD</i> | 1                      | 2                      | 3                      | 4                      | 5                      | 6                      | 7                      | 8                      | 9                      | 10                  | 11                  | 12                  | 13                  | 14                     |
|-------------------------------|----------|-----------|------------------------|------------------------|------------------------|------------------------|------------------------|------------------------|------------------------|------------------------|------------------------|---------------------|---------------------|---------------------|---------------------|------------------------|
| 1. Cheerful                   | 44.70    | 27.18     |                        |                        |                        |                        |                        |                        |                        |                        |                        |                     |                     |                     |                     |                        |
| 2. Enthusiastic               | 24.16    | 24.28     | .61**<br>[.59, .63]    |                        |                        |                        |                        |                        |                        |                        |                        |                     |                     |                     |                     |                        |
| 3. Relaxed                    | 44.97    | 26.55     | .51**<br>[.49, .53]    | .34**<br>[.31, .37]    |                        |                        |                        |                        |                        |                        |                        |                     |                     |                     |                     |                        |
| 4. Calm                       | 44.33    | 26.64     | .55**<br>[.53, .57]    | .39**<br>[.36, .41]    | .73**<br>[.71, .74]    |                        |                        |                        |                        |                        |                        |                     |                     |                     |                     |                        |
| 5. Irritated                  | 11.67    | 17.69     | -.21**<br>[-.24, -.18] | -.07**<br>[-.10, -.04] | -.25**<br>[-.27, -.22] | -.26**<br>[-.29, -.23] |                        |                        |                        |                        |                        |                     |                     |                     |                     |                        |
| 6. Worried                    | 17.79    | 20.80     | -.22**<br>[-.25, -.19] | -.09**<br>[-.12, -.06] | -.29**<br>[-.32, -.27] | -.32**<br>[-.35, -.29] | .46**<br>[.43, .48]    |                        |                        |                        |                        |                     |                     |                     |                     |                        |
| 7. Depressed                  | 11.00    | 18.27     | -.33**<br>[-.36, -.30] | -.17**<br>[-.20, -.14] | -.32**<br>[-.35, -.30] | -.32**<br>[-.35, -.30] | .43**<br>[.41, .46]    | .48**<br>[.46, .51]    |                        |                        |                        |                     |                     |                     |                     |                        |
| 8. Bored                      | 15.21    | 19.90     | -.13**<br>[-.16, -.10] | -.08**<br>[-.11, -.05] | -.05**<br>[-.08, -.02] | -.05**<br>[-.08, -.02] | .16**<br>[.13, .19]    | .15**<br>[.11, .18]    | .19**<br>[.16, .22]    |                        |                        |                     |                     |                     |                     |                        |
| 9. Nervous/stressed           | 21.34    | 21.87     | -.19**<br>[-.22, -.16] | -.06**<br>[-.09, -.03] | -.39**<br>[-.41, -.36] | -.38**<br>[-.40, -.35] | .47**<br>[.45, .50]    | .56**<br>[.54, .58]    | .36**<br>[.33, .38]    | .07**<br>[.04, .10]    |                        |                     |                     |                     |                     |                        |
| 10. Active                    | 34.02    | 26.38     | .51**<br>[.48, .53]    | .46**<br>[.43, .48]    | .20**<br>[.17, .23]    | .28**<br>[.25, .31]    | -.04*<br>[-.07, -.01]  | -.07**<br>[-.10, -.03] | -.17**<br>[-.20, -.14] | -.16**<br>[-.19, -.13] | .02<br>[-.01, .05]     |                     |                     |                     |                     |                        |
| 11. Present stress coping     | 59.77    | 21.54     | .48**<br>[.46, .50]    | .35**<br>[.32, .38]    | .50**<br>[.48, .52]    | .53**<br>[.50, .55]    | -.30**<br>[-.33, -.27] | -.43**<br>[-.46, -.41] | -.44**<br>[-.46, -.41] | -.06**<br>[-.09, -.02] | -.35**<br>[-.38, -.33] | .28**<br>[.25, .31] |                     |                     |                     |                        |
| 12. Anticipated stress coping | 61.00    | 23.05     | .49**<br>[.47, .52]    | .36**<br>[.33, .39]    | .48**<br>[.46, .51]    | .52**<br>[.50, .55]    | -.28**<br>[-.31, -.25] | -.40**<br>[-.43, -.38] | -.41**<br>[-.43, -.38] | -.07**<br>[-.10, -.04] | -.33**<br>[-.36, -.30] | .32**<br>[.29, .35] | .84**<br>[.83, .85] |                     |                     |                        |
| 13. Hunger                    | 25.04    | 26.10     | .07**<br>[.03, .10]    | .05**<br>[.02, .08]    | .02<br>[-.01, .05]     | .02<br>[-.01, .05]     | .05**<br>[.02, .08]    | -.02<br>[-.05, .01]    | -.04**<br>[-.07, -.01] | .03<br>[-.00, .06]     | .02<br>[-.01, .05]     | .07**<br>[.04, .10] | .05**<br>[.02, .08] | .06**<br>[.03, .09] |                     |                        |
| 14. Food Craving              | 21.53    | 25.11     | .06**<br>[.03, .09]    | .08**<br>[.05, .11]    | .01<br>[-.02, .04]     | .01<br>[-.02, .04]     | .11**<br>[.08, .14]    | .05**<br>[.02, .08]    | .00<br>[-.03, .03]     | .15**<br>[.12, .18]    | .07**<br>[.04, .10]    | .04**<br>[.01, .07] | .02<br>[-.01, .05]  | .02<br>[-.01, .05]  | .43**<br>[.41, .46] |                        |
| 15. Goal-congruent eating     | 54.61    | 26.86     | .17**<br>[.13, .20]    | .13**<br>[.09, .16]    | .11**<br>[.08, .15]    | .16**<br>[.12, .19]    | -.07**<br>[-.10, -.03] | -.05**<br>[-.08, -.01] | -.15**<br>[-.19, -.12] | -.09**<br>[-.12, -.05] | -.05**<br>[-.09, -.02] | .19**<br>[.16, .23] | .23**<br>[.19, .26] | .26**<br>[.22, .29] | -.01<br>[-.04, .03] | -.06**<br>[-.10, -.03] |

Note. *M* = mean and *SD* = standard deviation. Values in square brackets indicate the 95% confidence interval for each correlation. \* indicates  $p < .05$ . \*\* indicates  $p < .01$ .
